# Supplementary material for: Ultrafast black-color tunability of electrochromic dimming films using cobalt polyoxometalate-anchored nickel oxide nanoparticles
Source: Royal Society of Chemistry journal article supplement (doi:10.1039/d2ta07757d), 2023-01-01
Supplement: d2ta07757d1.pdf [file d2ta07757d1.pdf]

### Supplementary Information for

## Ultrafast black color tunability of electrochromic dimming films using cobalt polyoxometalate-anchored nickel oxide nanoparticles

*Hwandong Jang, Jinbo Kim, Minsu Han, Cheolhyun Cho, and Eunkyong Kim*

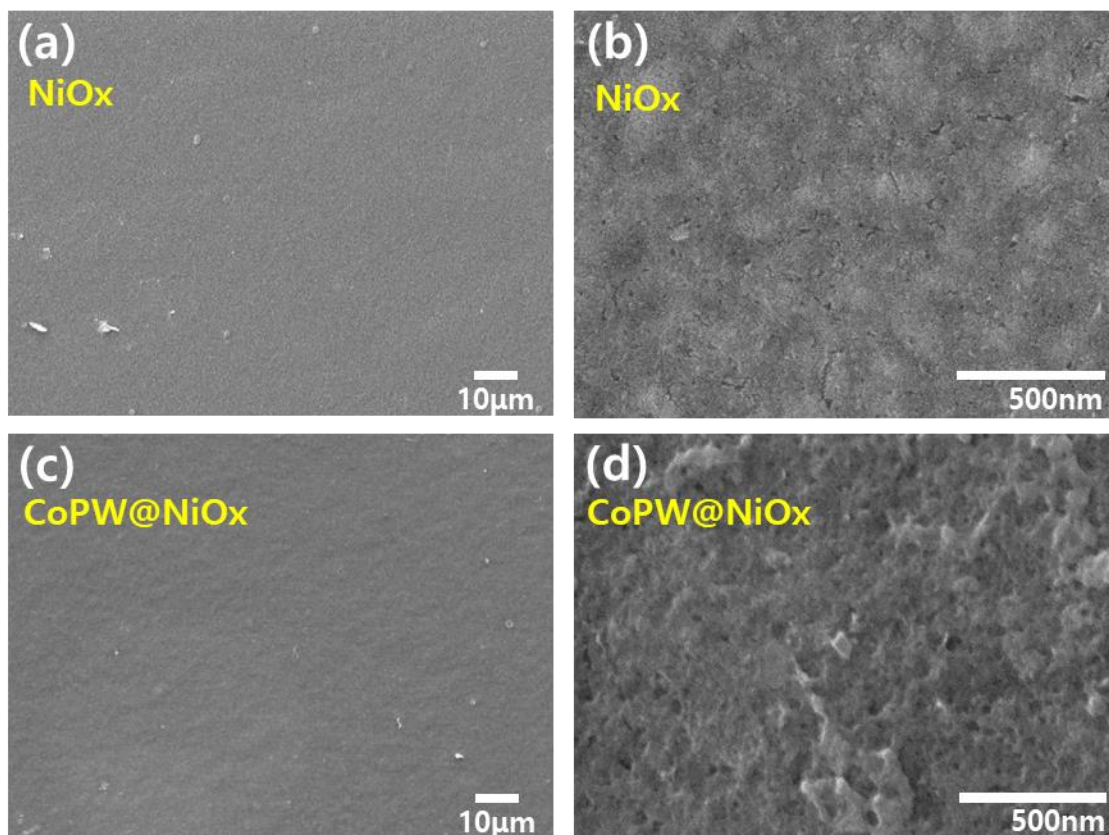

Fig. S1 Top view SEM image of NiOx film and CoPW anchored NiOx Film.

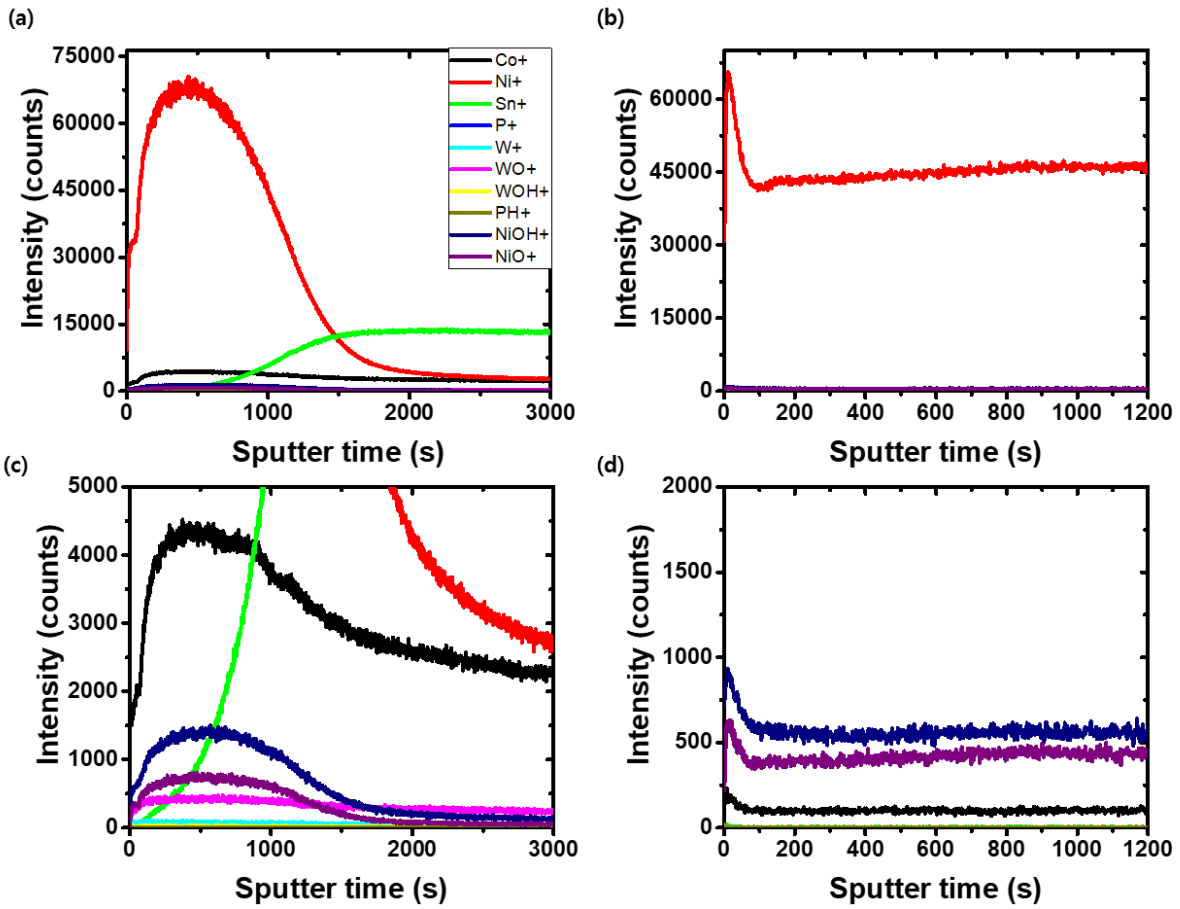

Fig. S2 TOF-SIMS depth profiling of (a, c) CoPW anchored NiOx Film and (b, d) NiOx film

(a)

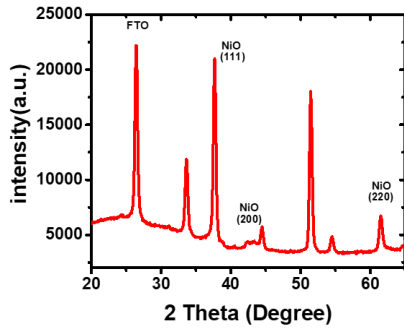

(b)

| No. | h | k | l  | d (Å)    | F(real)  | F(imag)  | F       | 2θ      | I        | M | λ | Phase |
|-----|---|---|----|----------|----------|----------|---------|---------|----------|---|---|-------|
| 1   | 0 | 1 | 1  | 13.02861 | -497.408 | -47.0415 | 499.628 | 6.779   | 48.8605  | 4 | 1 | 1     |
| 2   | 0 | 1 | 1  | 13.02861 | -497.129 | -47.2182 | 499.366 | 6.79544 | 24.2863  | 4 | 2 | 1     |
| 3   | 1 | 0 | -1 | 11.07676 | 1186.27  | 96.0423  | 1190.16 | 7.97532 | 100.0000 | 2 | 1 | 1     |
| 4   | 1 | 0 | -1 | 11.07676 | 1186.23  | 96.3907  | 1190.14 | 7.99467 | 49.7555  | 2 | 2 | 1     |
| 5   | 0 | 0 | 2  | 10.43596 | 540.896  | 45.8918  | 542.839 | 8.4659  | 18.4491  | 2 | 1 | 1     |
| 6   | 0 | 0 | 2  | 10.43596 | 540.708  | 46.0612  | 542.666 | 8.48644 | 9.1738   | 2 | 2 | 1     |
| 7   | 1 | 1 | 0  | 9.56492  | -75.1666 | -9.08007 | 75.7131 | 9.23846 | 0.6020   | 4 | 1 | 1     |
| 8   | 1 | 1 | 0  | 9.56492  | -74.8167 | -9.12045 | 75.3706 | 9.26088 | 0.2969   | 4 | 2 | 1     |
| 9   | 1 | 0 | 1  | 9.48727  | 295.195  | 27.4281  | 296.466 | 9.31424 | 4.5400   | 2 | 1 | 1     |
| 64  | 1 | 2 | -3 | 5.13413  | 317.184  | 29.1888  | 318.524 | 17.3    | 1.4913   | 4 | 2 | 1     |
| 65  | 2 | 1 | 1  | 5.11713  | -159.021 | -20.0993 | 160.286 | 17.3156 | 0.7539   | 4 | 1 | 1     |
| 66  | 2 | 1 | 1  | 5.11713  | -158.92  | -20.1751 | 160.195 | 17.3579 | 0.3746   | 4 | 2 | 1     |
| 166 | 0 | 2 | 5  | 3.73275  | -58.8421 | -6.45451 | 59.195  | 23.8185 | 0.0531   | 4 | 1 | 1     |

Fig. S3 (a) XRD pattern for NiOx film and lattice distance (inset), (b) Simulated lattice distance of CoPW.

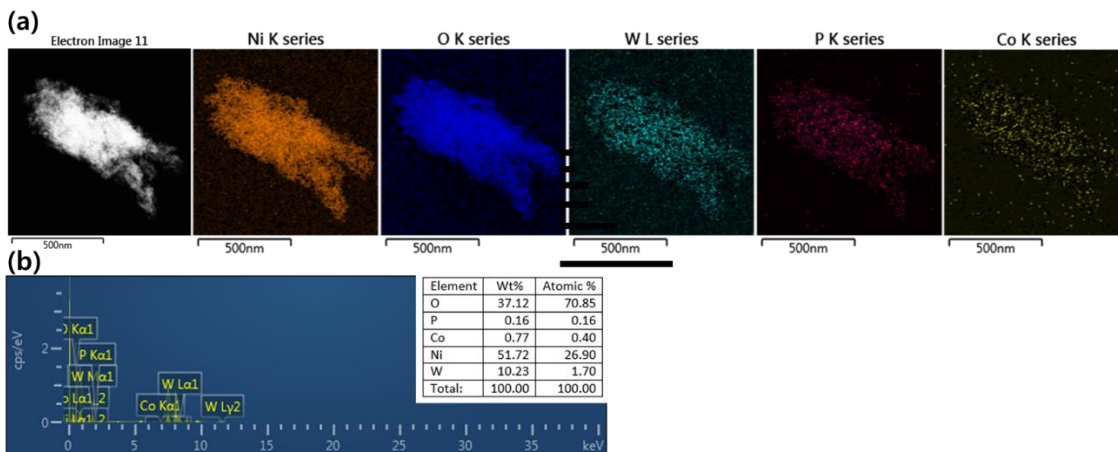

Fig. S4 (a) TEM-EDS mapping of the NiO<sub>x</sub>-CoPW nanoparticles; nanoparticles from CN400. The sample for TEM analysis was prepared by scratching off the film and dispersed in water. Finally, the water solution was drop on a copper mesh for TEM grid. (b) The corresponding energy-dispersive x-ray spectrum and table of elements

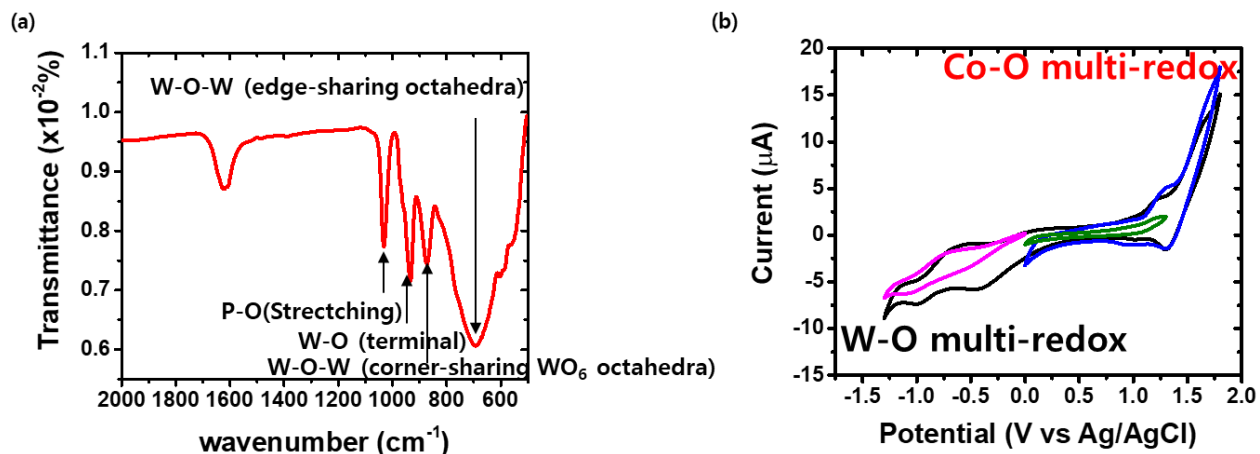

Fig. S5 (a) FT-IR spectra of KCoPW, (b) Cyclic voltammetry of TBACoPW 0.1M in acetonitrile in different potential range (black: 1.8 to -1.3 V, blue: 1.8 to 0 V, green: 1.3 to 0 V and magenta: 0 to -1.3 V, scan rate: 0.1 V/s). The two pairs of redox peaks at -0.54 V and -1.08 V are ascribed to the redox processes of tungsten atoms while the two oxidation peaks at 1.20, 1.67 V and reduction peaks of 1.02 V and 1.30 V correspond to the multi-electron transfer process of CoPW anions. These peaks were also observed in the CV of the CoPW anions in the salt with TBA cations.

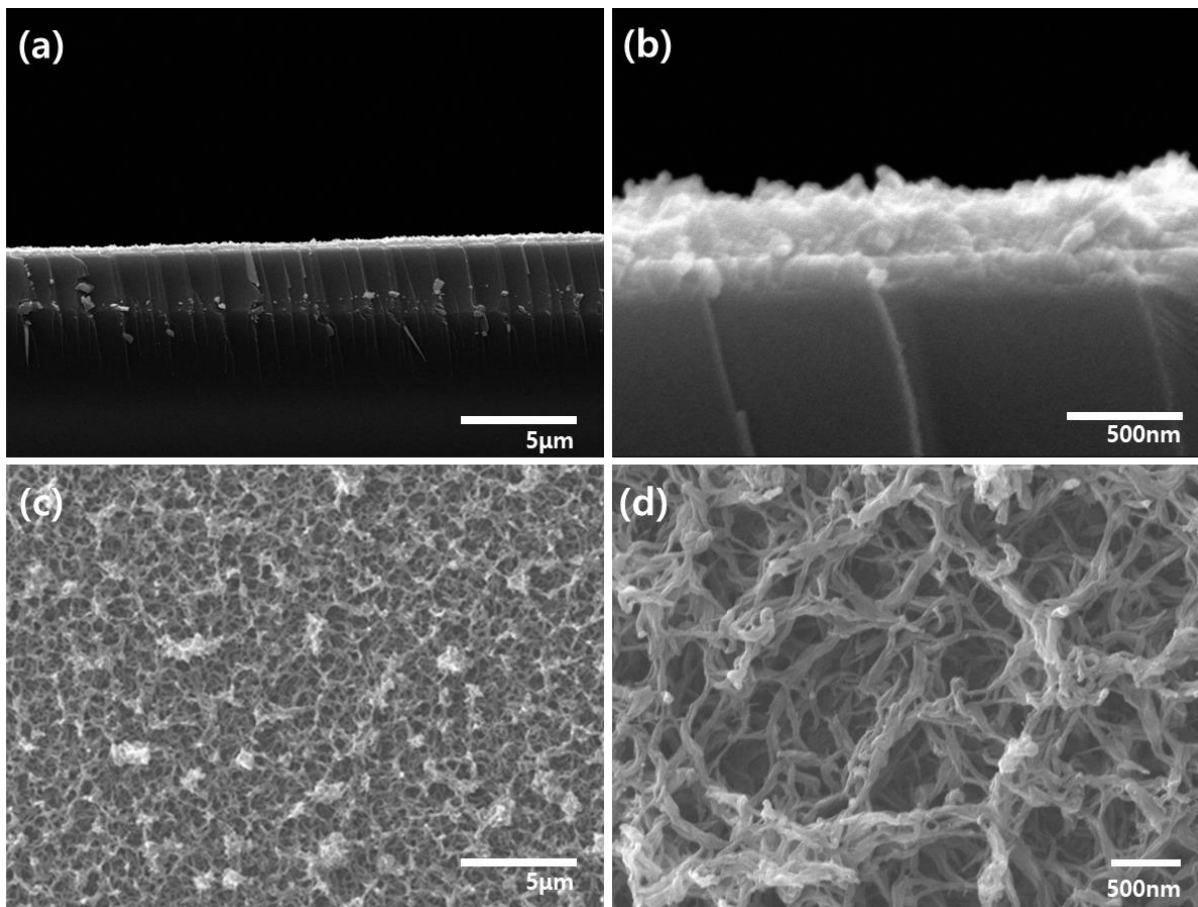

Fig. S6 SEM image of homogeneous electropolymerized PRBr electrode, (a) image of cross section (scale bar: 5 $\mu$ m), (b) image of cross section (scale bar: 500nm), (c) image of top section (scale bar: 5 $\mu$ m), (d) image of top section (scale bar: 500nm)

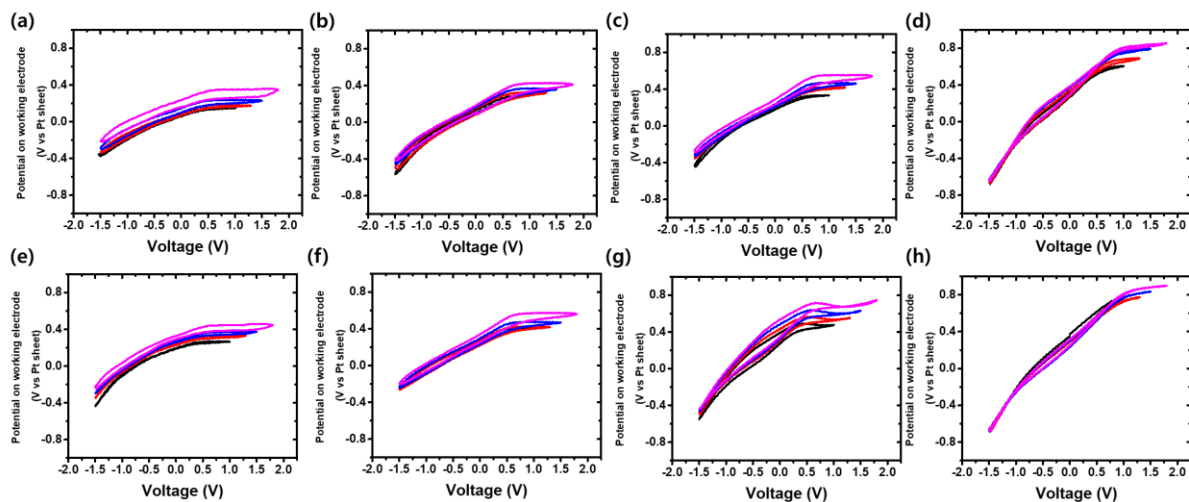

Fig. S7 The potential on the working electrode (solid line, V vs Pt sheet) under the different  $V_{ap}$  (black: 1.0/-1.5 V, red: 1.3/-1.5, blue: 1.5/-1.5 V, magenta: 1.8/-1.5 V).  $V_{ap}$  was applied by the potentiostat through the cyclic voltammetry with a scan rate of 100 mV/s for (a) PN200, (b) PN400, (c) PN550, (d) PN900, (e) PCN200, (f) PCN400, (g) PCN550 and (h) PCN900

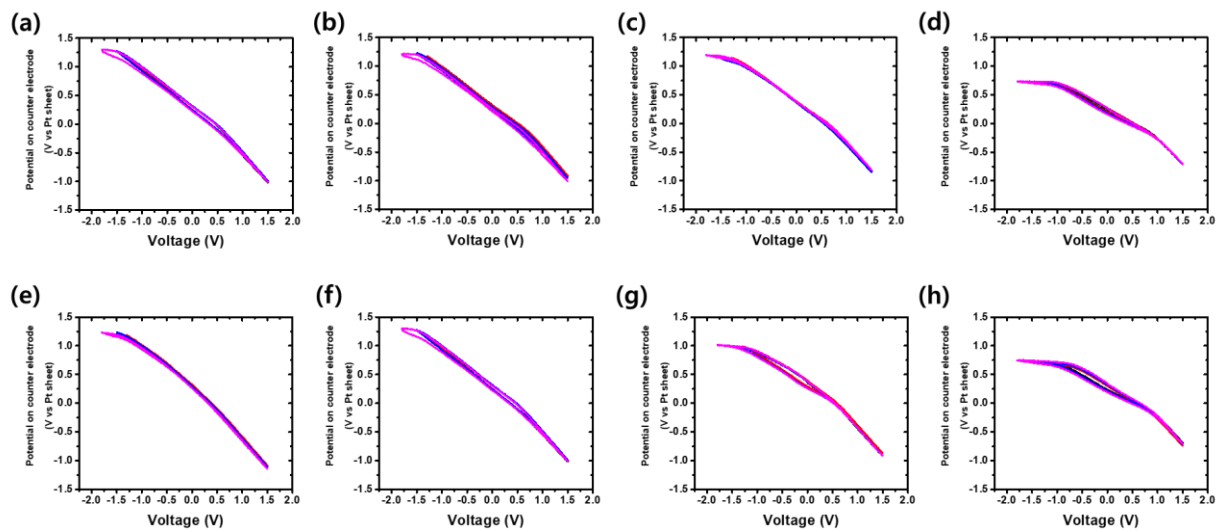

Fig. S8 The potential on the Counter electrode (solid line, V vs Pt sheet) under the different  $V_{ap}$  (black: 1.5/-1.0 V, red: 1.5/-1.3 V, blue: 1.5/-1.5 V, magenta: 1.5/-1.8 V).  $V_{ap}$  was applied by the potentiostat through the cyclic voltammetry with a scan rate of 100 mV/s for (a) PN200, (b) PN400, (c) PN550, (d) PN900, (e) PCN200, (f) PCN400, (g) PCN550 and (h) PCN900



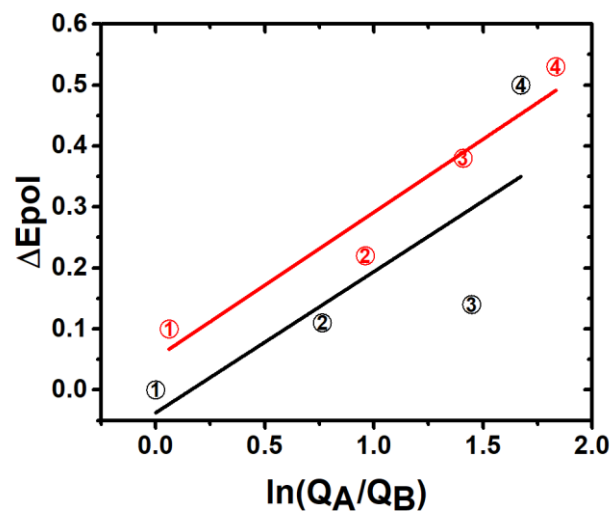

Fig. S9 Nernst relation between change of charge amount during EC reaction and change of  $E_{pol}$  by CoPW@NiOx (red) and NiOx (black) or thickness change. Charge amount during EC reaction was measured by cyclic voltammetry that represented as  $Q_x$ . Change of charge was estimated as charge ratio ( $Q_A/Q_B$ ). (1: 200nm, 2: 400nm, 3: 550nm, 4: 900nm)

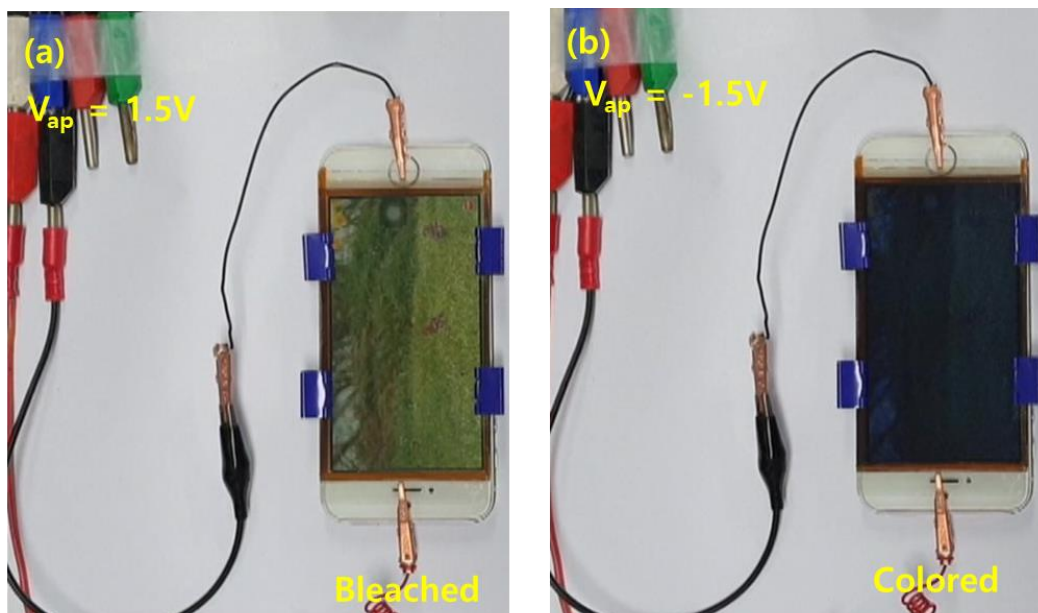

Fig. S10 Photographic image of a 4.1 inch smartphone ( $9 \times 5.2 \text{ cm}^2$ ) size PCN400 in (a) the bleached state and (b) colored state.

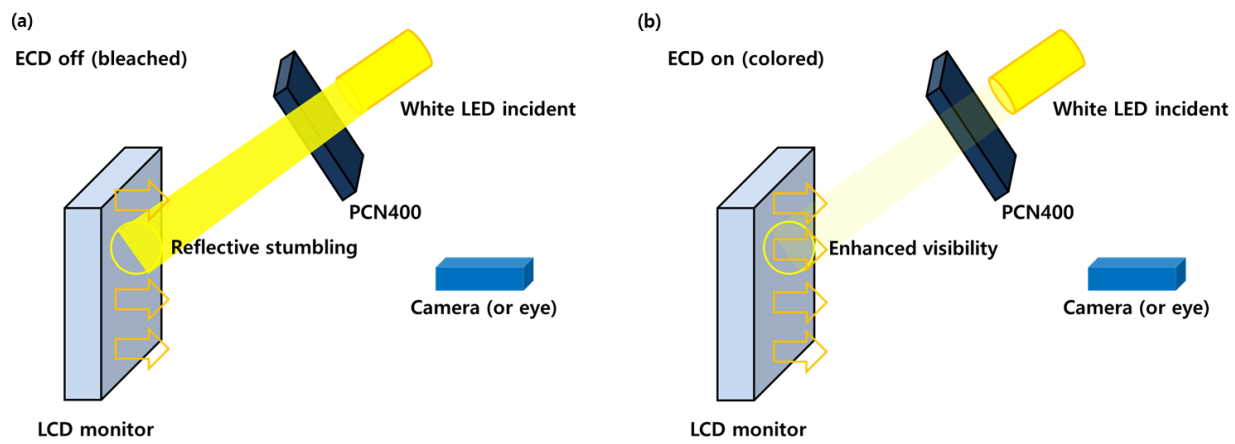

Fig. S11 A block diagram of the experimental setup used to block reflective light from a monitor when the ECD is (a) bleached state and (b) colored state.

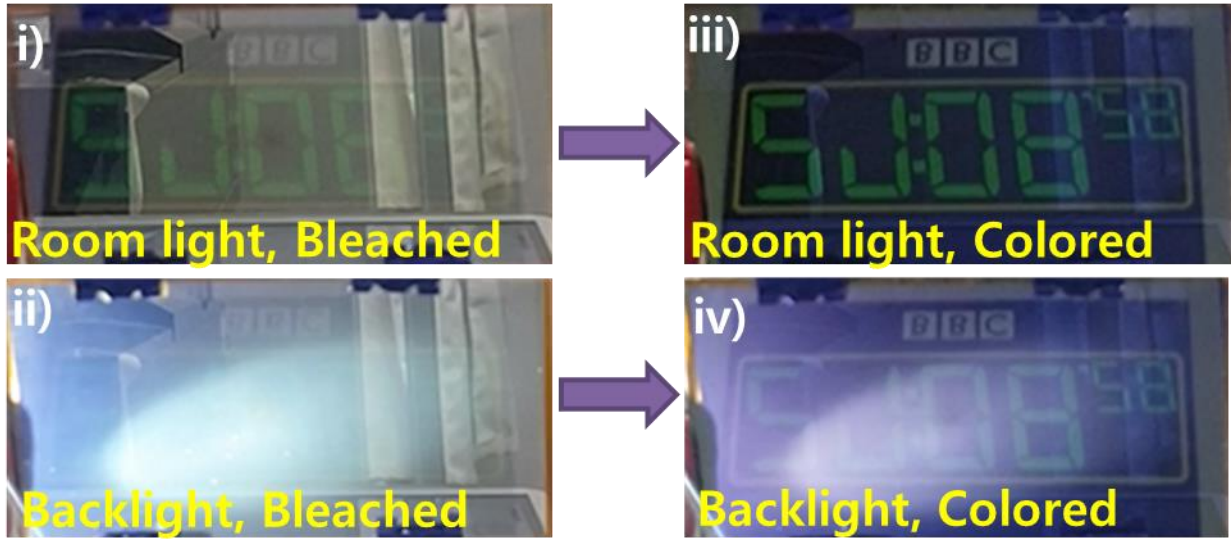

Fig. S12 Photographic images of enhancing visibility test in presence of projection display unit with a 4.1 inch PCN400.

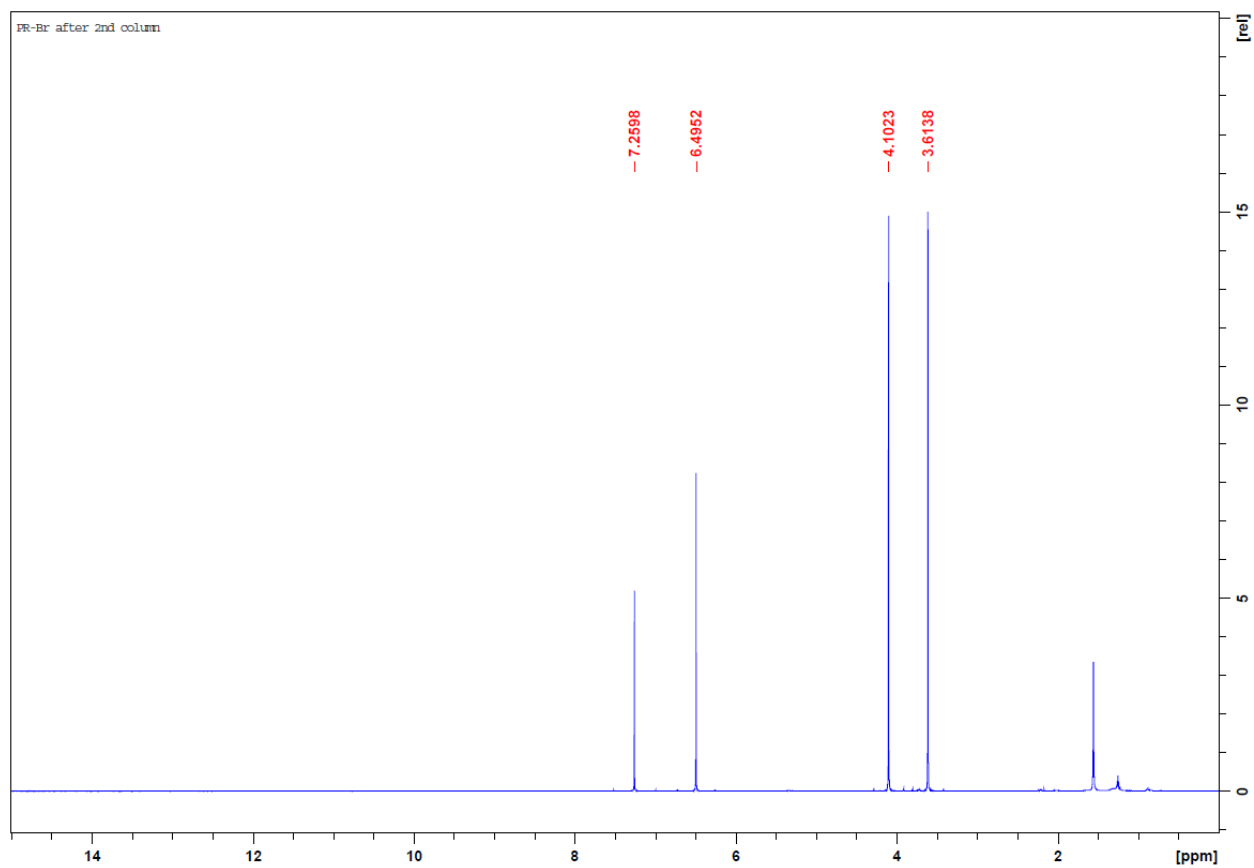

Fig. S13  $^1\text{H}$  NMR (300 MHz) spectrum of the 3,3-bis(bromomethyl)-3,4-dihydro-2H-thieno-[3,4-b][1,4]dioxepine.  $^1\text{H}$  NMR (300 MHz,  $\text{CDCl}_3$ ): 6.49 (s, 2H), 4.10 (s, 4H), 3.61 (s, 4H).

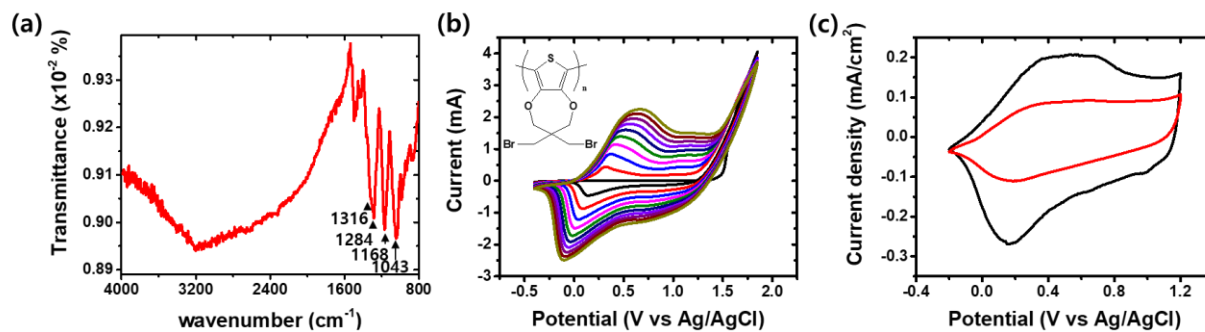

Fig. S14 (a) FT-IR spectra of PRBr collected from the electrodeposited PRBr on an ITO glass, showing a shoulder peak at 1316 cm<sup>-1</sup> and a peak at 1284 cm<sup>-1</sup>, characteristic for the stretching vibration of C-C and the C-S-C bond in the thiophene ring, respectively. The peaks at 1168 and 1043 cm<sup>-1</sup> are attributed to the stretching vibration of C-O in the propylenedioxy bridge and in the ether groups. (b) Cyclic voltammetry during the electrodeposition of PRBr on the ITO glass using a solution of 0.01 M 3,3-bis(bromomethyl)-3,4-dihydro-2H-thieno-[3,4-b][1,4]dioxepine and 0.5 M LiBF<sub>4</sub> in propylene carbonate. (c) 3-electrode cyclic voltammetry of solution casting polymerized PRBr (red) and electropolymerized PRBr (black) under BMIMTFSI electrolyte (scan rate: 100 mV/s)

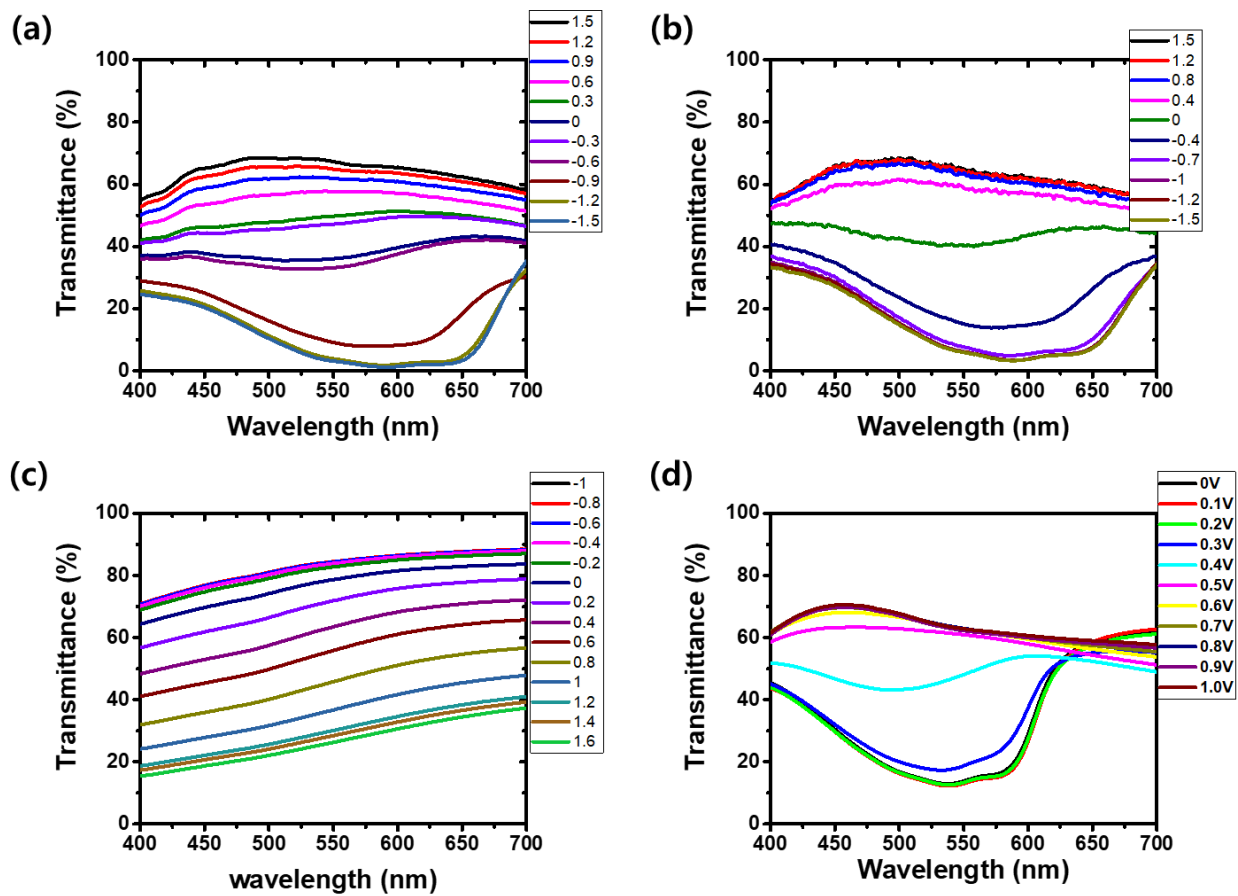

Fig. S15 Electrochromic behaviors of ECDs. Spectral change of PCN400 (a), PN400 (b), CN400 (c), and PN0 (d) over different  $V_{ap}$  (inset).

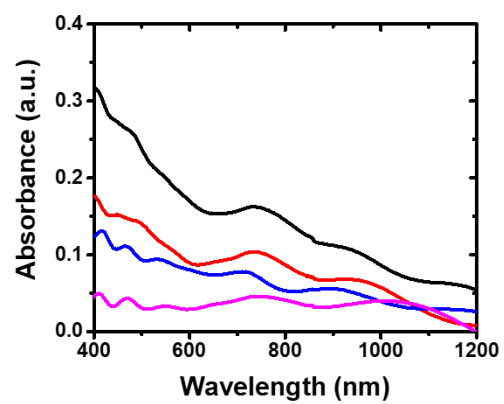

Fig. S16 UV-vis full spectrum of pristine NiOx. Absorption spectra of NiOx with 900 nm thickness (black), 550 nm thickness (red), 400 nm thickness (blue), 200 nm thickness (magenta).



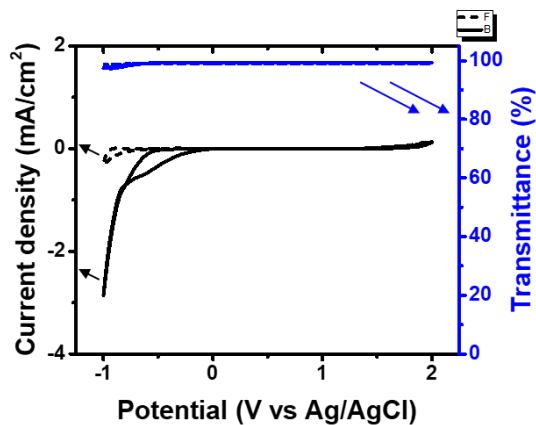

Fig. S17 Cyclic voltammetry (black) at a scan rate of 0.1 V/s and corresponding transmittance change at wavelength of 580 nm (blue) of CoPW (60  $\mu\text{g}$ ) coated TiO<sub>2</sub> nanoparticle film on FTO (solid line) as compared to those of a bared TiO<sub>2</sub> nanoparticle film on FTO (dashed line). The thickness of TiO<sub>2</sub> nanoparticle film in both devices was 550 nm.

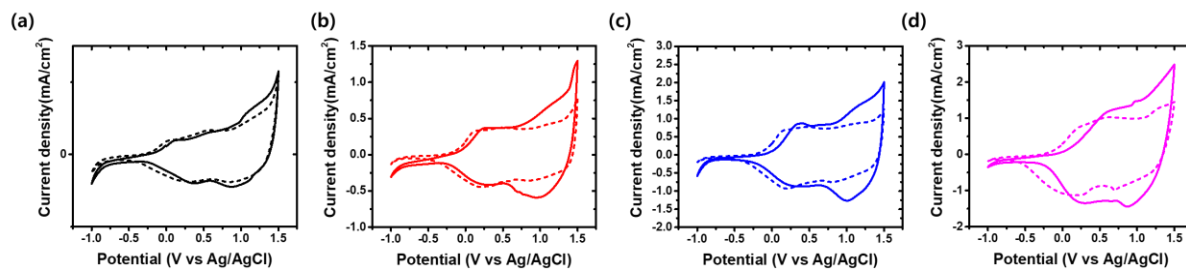

Fig. S18 3-Electrode cyclic voltammetry of (a) N200 (dotted line), CN200 (solid line), (b) N400 (dotted line), CN400 (dotted line), (c) N550 (dotted line), CN550 (solid line), (d) N900 (dotted line), CN900 (solid line).

Table S1. The structure and electrochromic properties of ECDs.

| Code   | WE <sup>a</sup> | CE            | Structure <sup>b</sup> | t-NiO <sup>c</sup><br>(nm) | C <sub>CoPW</sub> <sup>d</sup> |                               | V <sub>ap</sub><br>(V) | Color            | Transmittance <sup>e</sup> |                | Response time <sup>g</sup> |                          |                          | Cap <sup>h</sup><br>(mF/cm <sup>2</sup> ) | Col <sub>EF</sub><br>(cm <sup>2</sup> /mC) |
|--------|-----------------|---------------|------------------------|----------------------------|--------------------------------|-------------------------------|------------------------|------------------|----------------------------|----------------|----------------------------|--------------------------|--------------------------|-------------------------------------------|--------------------------------------------|
|        |                 |               |                        |                            | wt<br>(μg/cm <sup>2</sup> )    | SIMS<br>(μg/cm <sup>2</sup> ) |                        |                  | T <sub>b</sub>             | T <sub>c</sub> | ΔT <sup>f</sup><br>(%)     | τ <sub>c0.9</sub><br>(s) | τ <sub>b0.9</sub><br>(s) |                                           |                                            |
| N200   | NiOx            | Pt            | 3-ED                   | 200                        | 0                              | 0                             | 1.5/<br>-1.0           |                  | 99                         | 83             | 16                         | 3.4                      | 1                        | 1.12                                      | 20.51                                      |
| N400   | NiOx            | Pt            | 3-ED                   | 400                        | 0                              | 0                             | 1.5/<br>-1.0           |                  | 95                         | 64             | 31                         | 2.8                      | 1.6                      | 2.37                                      | 21.71                                      |
| N550   | NiOx            | Pt            | 3-ED                   | 550                        | 0                              | 0                             | 1.5/<br>-1.0           |                  | 88                         | 47             | 41                         | 2.6                      | 1.2                      | 4.7                                       | 17.39                                      |
| N900   | NiOx            | Pt            | 3-ED                   | 900                        | 0                              | 0                             | 1.5/<br>-1.0           | Brown            | 83                         | 37             | 46                         | 6                        | 4.6                      | 5.86                                      | 17.96                                      |
| CN200  | CoPW<br>@NiOx   | Pt            | 3-ED                   | 200                        | 15.9                           | 15.9                          | 1.5/<br>-1.0           | n-<br>black      | 99                         | 81             | 18                         | 1.8                      | 1.2                      | 1.17                                      | 22.35                                      |
| CN400  | CoPW<br>@NiOx   | Pt            | 3-ED                   | 400                        | 27.4                           | 30.8                          | 1.5/<br>-1.0           |                  | 95                         | 59             | 36                         | 2.2                      | 1.8                      | 2.88                                      | 21.55                                      |
| CN550  | CoPW<br>@NiOx   | Pt            | 3-ED                   | 550                        | 47.8                           | 40.8                          | 1.5/<br>-1.0           |                  | 89                         | 37             | 52                         | 3.8                      | 1.2                      | 5.71                                      | 20.03                                      |
| CN900  | CoPW<br>@NiOx   | Pt            | 3-ED                   | 900                        | 56.3                           | 48.2                          | 1.5/<br>-1.0           |                  | 83                         | 33             | 50                         | 5.8                      | 3.8                      | 6.9                                       | 17.42                                      |
| PN0    | PRBr            | FTO           | 2-ED                   | 0                          | 0                              | 0                             | 1.5/<br>-1.5           | Blue             | 40                         | 36             | 4                          | 6.2                      | 7.4                      | 0.06                                      | 190.7                                      |
| PN200  | PRBr            | NiOx          | 2-ED                   | 200                        | 0                              | 0                             | 1.5/<br>-1.5           |                  | 37                         | 3              | 34                         | 0.8                      | 2                        | 0.62                                      | 262.3                                      |
| PN400  | PRBr            | NiOx          | 2-ED                   | 400                        | 0                              | 0                             | 1.5/<br>-1.5           | Blue is<br>black | 69                         | 3              | 66                         | 0.8                      | 0.8                      | 1.14                                      | 330.9                                      |
| PN550  | PRBr            | NiOx          | 2-ED                   | 550                        | 0                              | 0                             | 1.5/<br>-1.5           |                  | 59                         | 1              | 58                         | 0.8                      | 0.8                      | 1.4                                       | 306.9                                      |
| PN900  | PRBr            | NiOx          | 2-ED                   | 900                        | 0                              | 0                             | 1.5/<br>-1.5           |                  | 58                         | 2              | 56                         | 0.8                      | 1.8                      | 1.1                                       | 243.7                                      |
| PCN200 | PRBr            | CoPW<br>@NiOx | 2-ED                   | 200                        | 15.9                           | 15.9                          | 1.5/<br>-1.5           | Blue             | 44                         | 3              | 41                         | 0.8                      | 2                        | 0.66                                      | 302.2                                      |
| PCN400 | PRBr            | CoPW<br>@NiOx | 2-ED                   | 400                        | 27.4                           | 30.8                          | 1.5/<br>-1.5           |                  | 74                         | 4              | 70                         | 0.4                      | 0.8                      | 1.24                                      | 367.4                                      |
| PCN550 | PRBr            | CoPW<br>@NiOx | 2-ED                   | 550                        | 47.8                           | 40.8                          | 1.5/<br>-1.5           | Black            | 62                         | 2              | 60                         | 0.8                      | 2.6                      | 1.58                                      | 332.5                                      |
| PCN900 | PRBr            | CoPW<br>@NiOx | 2-ED                   | 900                        | 56.3                           | 48.2                          | 1.5/<br>-1.5           |                  | 59                         | 2              | 57                         | 1                        | 1.6                      | 0.92                                      | 285.6                                      |

<sup>a</sup>Working electrode composed of PRBr on ITO glass (the thickness of PRBr = 350 nm). <sup>b</sup>3-ED: 3-electrode

system with Ag/AgCl as reference electrode, 2-ED: 2-electrode system in the presence of a Pt sheet.

<sup>c</sup>Thickness of pristine and CoPW anchored NiOx film. <sup>d</sup>Mass of CoPW contents anchored on NiOx layer

determined by measuring the sample weight (wt) and by SIMS. <sup>e</sup>Transmittance at bleached (T<sub>b</sub>), colored

(T<sub>c</sub>) state, and <sup>f</sup>color contrast (ΔT = T<sub>b</sub> - T<sub>c</sub>), monitored at wavelength of 580 nm, <sup>g</sup>Time for transmittance

change for 95 % in coloration (τ<sub>c</sub>) and bleaching (τ<sub>b</sub>). <sup>h</sup>Capacitance determined at Galvanostatic charging

discharging curve in 2-ED and Cyclic voltammetry in 3-ED.

Table S2. Electrochemical properties of ECD under different applied voltages (positive voltage extension).

|                     | PR-Br<br>Thickness<br>(nm) | NiOx<br>Thickness<br>(nm) | $C_{CoPW}$<br>( $\mu\text{g}/\text{cm}^2$ ) | $T_b^a$ (%) | $T_c^a$<br>(%) | $\Delta T_{580\text{nm}}$ | $E_{\text{pol, Oxi}}^b$<br>(V) | $E_{\text{pol, Red}}^b$<br>(V) | $E_{\text{ce, Oxi}}^b$<br>(V) | $E_{\text{ce, Red}}^b$<br>(V) |
|---------------------|----------------------------|---------------------------|---------------------------------------------|-------------|----------------|---------------------------|--------------------------------|--------------------------------|-------------------------------|-------------------------------|
| <b>1.0V ~ -1.5V</b> |                            |                           |                                             |             |                |                           |                                |                                |                               |                               |
| <b>PN0</b>          | 350                        | 0                         | 0                                           | 33          | 31             | 2                         | 0.16                           | 0.12                           | 1.62                          | -0.84                         |
| <b>PCN200</b>       | 350                        | 200                       | 15.9                                        | 34          | 2              | 32                        | 0.27                           | -0.44                          | 1.06                          | -0.73                         |
| <b>PN200</b>        | 350                        | 200                       | 0                                           | 33          | 3              | 30                        | 0.15                           | -0.38                          | 1.12                          | -0.85                         |
| <b>PCN400</b>       | 350                        | 400                       | 27.4                                        | 69          | 3              | 64                        | 0.39                           | -0.26                          | 1.24                          | -0.61                         |
| <b>PN400</b>        | 350                        | 400                       | 0                                           | 62          | 3              | 59                        | 0.30                           | -0.57                          | 0.93.                         | -0.70                         |
| <b>PCN550</b>       | 350                        | 550                       | 47.8                                        | 52          | 2              | 50                        | 0.57                           | -0.49                          | 1.01                          | -0.43                         |
| <b>PN550</b>        | 350                        | 550                       | 0                                           | 50          | 1              | 49                        | 0.33                           | -0.44                          | 1.06                          | -0.67                         |
| <b>PCN900</b>       | 350                        | 900                       | 56.3                                        | 55          | 2              | 53                        | 0.64                           | -0.67                          | 0.83                          | -0.36                         |
| <b>PN900</b>        | 350                        | 900                       | 0                                           | 56          | 2              | 54                        | 0.72                           | -0.66                          | 0.84                          | -0.28                         |
| <b>1.3V ~ -1.5V</b> |                            |                           |                                             |             |                |                           |                                |                                |                               |                               |
| <b>PN0</b>          | 350                        | 0                         | 0                                           | 35          | 33             | 2                         | 0.23                           | 0.15                           | 1.65                          | -1.07                         |
| <b>PCN200</b>       | 350                        | 200                       | 15.9                                        | 39          | 2              | 37                        | 0.34                           | -0.35                          | 1.15                          | -0.96                         |
| <b>PN200</b>        | 350                        | 200                       | 0                                           | 33          | 3              | 30                        | 0.18                           | -0.34                          | 1.16                          | -1.12                         |
| <b>PCN400</b>       | 350                        | 400                       | 27.4                                        | 70          | 3              | 67                        | 0.43                           | -0.26                          | 1.24                          | -0.87                         |
| <b>PN400</b>        | 350                        | 400                       | 0                                           | 66          | 3              | 63                        | 0.32                           | -0.51                          | 0.99                          | -0.98                         |
| <b>PCN550</b>       | 350                        | 550                       | 47.8                                        | 60          | 2              | 58                        | 0.59                           | -0.49                          | 1.01                          | -0.71                         |
| <b>PN550</b>        | 350                        | 550                       | 0                                           | 57          | 1              | 56                        | 0.38                           | -0.39                          | 1.11                          | -0.92                         |
| <b>PCN900</b>       | 350                        | 900                       | 56.3                                        | 58          | 2              | 56                        | 0.74                           | -0.64                          | 0.86                          | -0.56                         |
| <b>PN900</b>        | 350                        | 900                       | 0                                           | 57          | 2              | 55                        | 0.74                           | -0.72                          | 0.78                          | -0.56                         |
| <b>1.5V ~ -1.5V</b> |                            |                           |                                             |             |                |                           |                                |                                |                               |                               |
| <b>PN0</b>          | 350                        | 0                         | 0                                           | 40          | 36             | 4                         | 0.29                           | 0.17                           | 1.67                          | -1.21                         |
| <b>PCN200</b>       | 350                        | 200                       | 15.9                                        | 44          | 3              | 41                        | 0.38                           | -0.30                          | 1.2                           | -1.12                         |
| <b>PN200</b>        | 350                        | 200                       | 0                                           | 37          | 3              | 34                        | 0.24                           | -0.28                          | 1.22                          | -1.26                         |
| <b>PCN400</b>       | 350                        | 400                       | 27.4                                        | 73          | 4              | 69                        | 0.48                           | -0.25                          | 1.25                          | -1.02                         |
| <b>PN400</b>        | 350                        | 400                       | 0                                           | 69          | 3              | 66                        | 0.36                           | -0.45                          | 1.05                          | -1.14                         |
| <b>PCN550</b>       | 350                        | 550                       | 47.8                                        | 62          | 2              | 60                        | 0.64                           | -0.46                          | 1.04                          | -0.86                         |
| <b>PN550</b>        | 350                        | 550                       | 0                                           | 59          | 1              | 58                        | 0.42                           | -0.35                          | 1.15                          | -1.08                         |
| <b>PCN900</b>       | 350                        | 900                       | 56.3                                        | 59          | 2              | 57                        | 0.82                           | -0.62                          | 0.88                          | -0.68                         |

|                         |     |     |      |    |    |    |      |       |      |       |
|-------------------------|-----|-----|------|----|----|----|------|-------|------|-------|
| <b>PN900</b>            | 350 | 900 | 0    | 58 | 2  | 56 | 0.79 | -0.71 | 0.79 | -0.71 |
| <b>1.8V ~<br/>-1.5V</b> |     |     |      |    |    |    |      |       |      |       |
| <b>PN0</b>              | 350 | 0   | 0    | 45 | 40 | 5  | 0.38 | 0.22  | 1.72 | -1.42 |
| <b>PCN200</b>           | 350 | 200 | 15.9 | 55 | 3  | 52 | 0.46 | -0.24 | 1.26 | -1.34 |
| <b>PN200</b>            | 350 | 200 | 0    | 54 | 3  | 51 | 0.36 | -0.20 | 1.3  | -1.44 |
| <b>PCN400</b>           | 350 | 400 | 27.4 | 74 | 4  | 70 | 0.58 | -0.20 | 1.3  | -1.22 |
| <b>PN400</b>            | 350 | 400 | 0    | 70 | 3  | 67 | 0.42 | -0.41 | 1.09 | -1.38 |
| <b>PCN550</b>           | 350 | 550 | 47.8 | 65 | 2  | 63 | 0.74 | -0.45 | 1.05 | -1.06 |
| <b>PN550</b>            | 350 | 550 | 0    | 60 | 1  | 59 | 0.47 | -0.32 | 1.18 | -1.33 |
| <b>PCN900</b>           | 350 | 900 | 56.3 | 60 | 2  | 58 | 0.89 | -0.63 | 0.87 | -0.91 |
| <b>PN900</b>            | 350 | 900 | 0    | 59 | 2  | 57 | 0.86 | -0.76 | 0.74 | -0.94 |

<sup>a</sup>T<sub>b</sub> = transmittance at bleached state, T<sub>c</sub> = transmittance at colored state, ΔT = T<sub>b</sub> - T<sub>c</sub>, monitored at 580 nm

under given E<sub>ap</sub>, <sup>b</sup>E<sub>pol</sub> and E<sub>CE</sub> are the measured potential at WE and CE under the given V<sub>ap</sub>, respectively.

E<sub>pol.oxi</sub> and E<sub>pol.red</sub> are recorded potential on working electrode when the working electrode in ECD undergoes oxidation state and reduction state, respectively. E<sub>CE.oxi</sub> and E<sub>CE.red</sub> are recorded potential on counter electrode under oxidation state and reduction state.

Table S3. Electrochemical properties of ECD under different applied voltages (negative voltage extension).

|                     | PR-Br<br>Thickness<br>(nm) | NiOx<br>Thickness<br>(nm) | $C_{CoPW}$<br>( $\mu\text{g}/\text{cm}^2$ ) | $T_b^a$ (%) | $T_c^a$<br>(%) | $\Delta T_{670\text{nm}}^a$ | $E_{\text{pol, Oxi}}^b$<br>(V) | $E_{\text{pol, Red}}^b$<br>(V) | $E_{\text{ce, Oxi}}^b$<br>(V) | $E_{\text{ce, Red}}^b$<br>(V) |
|---------------------|----------------------------|---------------------------|---------------------------------------------|-------------|----------------|-----------------------------|--------------------------------|--------------------------------|-------------------------------|-------------------------------|
| <b>1.5V ~ -1.0V</b> |                            |                           |                                             |             |                |                             |                                |                                |                               |                               |
| <b>PN0</b>          | 350                        | 0                         | 0                                           | 43          | 42             | 1                           |                                |                                |                               |                               |
| <b>PCN200</b>       | 350                        | 200                       | 15.9                                        | 49          | 25             | 24                          | 0.4                            | 0                              | 1.00                          | -1.1                          |
| <b>PN200</b>        | 350                        | 200                       | 0                                           | 46          | 25             | 21                          | 0.4                            | 0.05                           | 1.05                          | -1.1                          |
| <b>PCN400</b>       | 350                        | 400                       | 27.4                                        | 62          | 21             | 41                          | 0.56                           | -0.12                          | 0.88                          | -0.94                         |
| <b>PN400</b>        | 350                        | 400                       | 0                                           | 61          | 32             | 29                          | 0.52                           | 0.04                           | 1.04                          | -0.98                         |
| <b>PCN550</b>       | 350                        | 550                       | 47.8                                        | 50          | 21             | 29                          | 0.68                           | -0.12                          | 0.88                          | -0.82                         |
| <b>PN550</b>        | 350                        | 550                       | 0                                           | 55          | 15             | 40                          | 0.62                           | 0.04                           | 1.04                          | -0.88                         |
| <b>PCN900</b>       | 350                        | 900                       | 56.3                                        | 57          | 13             | 44                          | 0.78                           | -0.33                          | 0.67                          | -0.72                         |
| <b>PN900</b>        | 350                        | 900                       | 0                                           | 56          | 14             | 42                          | 0.81                           | -0.31                          | 0.69                          | -0.69                         |
| <b>1.5V ~ -1.3V</b> |                            |                           |                                             |             |                |                             |                                |                                |                               |                               |
| <b>PN0</b>          | 350                        | 0                         | 0                                           | 45          | 44             | 1                           |                                |                                |                               |                               |
| <b>PCN200</b>       | 350                        | 200                       | 15.9                                        | 49          | 17             | 32                          | 0.4                            | -0.13                          | 1.17                          | -1.1                          |
| <b>PN200</b>        | 350                        | 200                       | 0                                           | 46          | 17             | 28                          | 0.4                            | -0.03                          | 1.27                          | -1.1                          |
| <b>PCN400</b>       | 350                        | 400                       | 27.4                                        | 62          | 15             | 47                          | 0.6                            | -0.23                          | 1.07                          | -0.9                          |
| <b>PN400</b>        | 350                        | 400                       | 0                                           | 61          | 21             | 40                          | 0.51                           | -0.01                          | 1.29                          | -0.99                         |
| <b>PCN550</b>       | 350                        | 550                       | 47.8                                        | 55          | 11             | 44                          | 0.69                           | -0.23                          | 1.07                          | -0.81                         |
| <b>PN550</b>        | 350                        | 550                       | 0                                           | 55          | 9              | 46                          | 0.64                           | -0.13                          | 1.17                          | -0.86                         |
| <b>PCN900</b>       | 350                        | 900                       | 56.3                                        | 57          | 11             | 46                          | 0.79                           | -0.62                          | 0.68                          | -0.71                         |
| <b>PN900</b>        | 350                        | 900                       | 0                                           | 56          | 11             | 45                          | 0.77                           | -0.56                          | 0.74                          | -0.73                         |
| <b>1.5V ~ -1.5V</b> |                            |                           |                                             |             |                |                             |                                |                                |                               |                               |
| <b>PN0</b>          | 350                        | 0                         | 0                                           | 45          | 44             | 1                           |                                |                                |                               |                               |
| <b>PCN200</b>       | 350                        | 200                       | 15.9                                        | 48          | 13             | 35                          | 0.35                           | -0.28                          | 1.22                          | -1.15                         |
| <b>PN200</b>        | 350                        | 200                       | 0                                           | 44          | 13             | 31                          | 0.38                           | -0.18                          | 1.32                          | -1.12                         |
| <b>PCN400</b>       | 350                        | 400                       | 27.4                                        | 62          | 14             | 48                          | 0.6                            | -0.53                          | 0.97                          | -0.9                          |
| <b>PN400</b>        | 350                        | 400                       | 0                                           | 60          | 16             | 44                          | 0.49                           | -0.12                          | 1.38                          | -1.01                         |
| <b>PCN550</b>       | 350                        | 550                       | 47.8                                        | 55          | 9              | 46                          | 0.66                           | -0.53                          | 0.97                          | -0.84                         |
| <b>PN550</b>        | 350                        | 550                       | 0                                           | 55          | 8              | 47                          | 0.6                            | -0.33                          | 1.17                          | -0.9                          |
| <b>PCN900</b>       | 350                        | 900                       | 56.3                                        | 57          | 11             | 46                          | 0.79                           | -0.78                          | 0.72                          | -0.71                         |

|                         |     |     |      |    |    |    |      |       |      |       |
|-------------------------|-----|-----|------|----|----|----|------|-------|------|-------|
| <b>PN900</b>            | 350 | 900 | 0    | 56 | 11 | 45 | 0.8  | -0.78 | 0.72 | -0.7  |
| <b>1.5V ~<br/>-1.8V</b> |     |     |      |    |    |    |      |       |      |       |
| <b>PN0</b>              | 350 | 0   | 0    | 44 | 42 | 2  |      |       |      |       |
| <b>PCN200</b>           | 350 | 200 | 15.9 | 48 | 13 | 35 | 0.3  | -0.57 | 1.23 | -1.2  |
| <b>PN200</b>            | 350 | 200 | 0    | 43 | 12 | 31 | 0.35 | -0.47 | 1.33 | -1.15 |
| <b>PCN400</b>           | 350 | 400 | 27.4 | 62 | 14 | 48 | 0.54 | -0.74 | 1.06 | -0.96 |
| <b>PN400</b>            | 350 | 400 | 0    | 60 | 14 | 46 | 0.48 | -0.28 | 1.52 | -1.02 |
| <b>PCN550</b>           | 350 | 550 | 47.8 | 55 | 8  | 47 | 0.7  | -0.74 | 1.06 | -0.8  |
| <b>PN550</b>            | 350 | 550 | 0    | 55 | 8  | 47 | 0.6  | -0.56 | 1.24 | -0.9  |
| <b>PCN900</b>           | 350 | 900 | 56.3 | 57 | 11 | 46 | 0.8  | -1.06 | 0.74 | -0.7  |
| <b>PN900</b>            | 350 | 900 | 0    | 57 | 10 | 47 | 0.83 | -1.04 | 0.76 | -0.67 |

Table S4. The EC property compared with nickel oxide based darkish electrochromic devices.

| Material                                                          | Cell type<br>(half/full cell) | $\Delta T$<br>(%) | $T_c$<br>(%) | $T_b$<br>(%) | $\tau_{c0.95}$<br>(s) | $\tau_{b0.95}$<br>(s) | $\lambda_{\text{measured}}$<br>(nm) | Color        | Voltage Range<br>(V) | Ref.       |
|-------------------------------------------------------------------|-------------------------------|-------------------|--------------|--------------|-----------------------|-----------------------|-------------------------------------|--------------|----------------------|------------|
| PCN400(this work)                                                 | Full cell                     | <b>70</b>         | <b>4</b>     | <b>74</b>    | <b>0.4</b>            | <b>0.8</b>            | <b>580</b>                          | <b>Black</b> | <b>1.5 to -1.5</b>   | This paper |
| NiO-pyridine                                                      | Half cell                     | 41.5              | 46.5         | 87           | 1.77                  | 2.91                  | 550                                 | Black        | 1.5 to -1.5          | (1)        |
| Bi/Cu(Electrodeposition mechanism)                                | Full cell                     | 69                | 11           | 80           | 30                    | 3                     | 600                                 | black        | 0.8 to -0.6          | (2)        |
| cross-linked poly(4-vinyltriphenylamine) (480nm)/Cu               | Full cell                     | 82.9              | 5.1          | 88           | 8.5                   | 68.7                  | 700                                 | black        | 2 to -2              | (3)        |
| Sputtered Nickel oxide (Ta, Ni, W)                                | Full cell                     | 67.1              | 11.9         | 79           | 14.9                  | 1.5                   | 600                                 | Brown-black  | 1.8 to -1.8          | (4)        |
| Si-Li codoping Nickel oxide coating with sputtered Zinc tin oxide | Half cell                     | 35.5              | 50.0         | 85.5         | 10.2                  | 7.8                   | 550                                 | Brown        | 1.2 to -1.2          | (5)        |
| Ni-Co mixed hydroxide                                             | Half cell                     | 38.2              | 37.7         | 75.9         | 1                     | 1                     | 635                                 | Brown-black  | 0.6 to 0             | (6)        |



Table S5. Electrochemical properties and carrier concentration of N200 ~ 900 and CN200 ~ 900.

| Electrode | <sup>A</sup> C <sub>CoPW</sub><br>( $\mu\text{g}/\text{cm}^2$ ) | <sup>B</sup> C <sub>CoPW</sub><br>( $\mu\text{g}/\text{cm}^2$ ) | E <sup>P</sup> <sub>ox</sub> <sup>1st</sup><br>(V) | Current density<br>(mA/cm <sup>2</sup> ) | E <sup>P</sup> <sub>ox</sub> <sup>2nd</sup><br>(V) | Current density<br>(mA/cm <sup>2</sup> ) | E <sup>P</sup> <sub>red</sub> <sup>1st</sup><br>(V) | Current density<br>(mA/cm <sup>2</sup> ) | E <sup>P</sup> <sub>red</sub> <sup>2nd</sup><br>(V) | Current density<br>(mA/cm <sup>2</sup> ) | C <sub>E</sub> <sup>1st</sup> <sub>1/2</sub><br>(V) | C <sub>E</sub> <sup>2nd</sup> <sub>1/2</sub><br>(V) | Areal charge<br>(mC/cm <sup>2</sup> ) | % increase<br>in charge<br>amount | <sup>D</sup> Carrier<br>concentration<br>(/cm <sup>3</sup> ) |
|-----------|-----------------------------------------------------------------|-----------------------------------------------------------------|----------------------------------------------------|------------------------------------------|----------------------------------------------------|------------------------------------------|-----------------------------------------------------|------------------------------------------|-----------------------------------------------------|------------------------------------------|-----------------------------------------------------|-----------------------------------------------------|---------------------------------------|-----------------------------------|--------------------------------------------------------------|
| N200      | 0                                                               | 0                                                               | 0.58                                               | 0.17                                     | 1.02                                               | 0.21                                     | 0.87                                                | -0.19                                    | 0.25                                                | -0.19                                    | 0.42                                                | 0.95                                                | 5.6                                   | -                                 | -                                                            |
| CN200     | 15.9                                                            | 15.9                                                            | 0.57                                               | 0.15                                     | 1.13                                               | 0.31                                     | 0.88                                                | -0.22                                    | 0.37                                                | -0.2                                     | 0.47                                                | 1.01                                                | 5.9                                   | 5                                 | -                                                            |
| N400      | 0                                                               | 0                                                               | 0.54                                               | 0.37                                     | 1.06                                               | 0.41                                     | 0.87                                                | -0.37                                    | 0.19                                                | -0.44                                    | 0.37                                                | 0.97                                                | 11.8                                  | -                                 | 3.06E+19                                                     |
| CN400     | 27.4                                                            | 30.8                                                            | 0.55                                               | 0.37                                     | 1.18                                               | 0.72                                     | 0.98                                                | -0.59                                    | 0.3                                                 | -0.42                                    | 0.43                                                | 1.08                                                | 14.4                                  | 22                                | 3.69E+19                                                     |
| N550      | 0                                                               | 0                                                               | 0.51                                               | 0.77                                     | 1.13                                               | 0.87                                     | 0.85                                                | -0.74                                    | 0.21                                                | -0.93                                    | 0.36                                                | 0.99                                                | 23.5                                  | -                                 | 1.584E+20                                                    |
| CN550     | 47.8                                                            | 40.7                                                            | 0.42                                               | 0.87                                     | 1.19                                               | 1.41                                     | 1.01                                                | -1.26                                    | 0.32                                                | -0.87                                    | 0.37                                                | 1.1                                                 | 28.5                                  | 21                                | 1.851E+20                                                    |
| N900      | 0                                                               | 0                                                               | 0.61                                               | 1.03                                     | 1.33                                               | 1.32                                     | 0.71                                                | -0.99                                    | 0.18                                                | -1.13                                    | 0.4                                                 | 1.02                                                | 29.3                                  | -                                 | -                                                            |
| CN900     | 56.3                                                            | 48.2                                                            | 0.66                                               | 1.23                                     | 1.26                                               | 1.87                                     | 0.86                                                | -1.44                                    | 0.26                                                | -1.34                                    | 0.46                                                | 1.06                                                | 34.5                                  | 17                                | -                                                            |

C<sub>CoPW</sub> is the contents of CoPW determined by <sup>A</sup> weighing the mass of the film and <sup>B</sup> calculating according to the weight percentage of elements obtained from the TOF-SIMS. E<sup>P</sup><sub>red</sub> and E<sup>P</sup><sub>ox</sub> (V vs vs Ag/AgCl) were determined from the cyclic voltammetry in 1 M Li<sup>+</sup> containing BMIM TFSI, which was used as the electrolyte. <sup>C</sup> Half-wave potential. <sup>D</sup> Carrier concentration was obtained from the Hall effect measurement.

## REFERENCES of Supplementary Information

- (1) XIE, Zhiqiang, et al. Large coloration efficiency and fast response NiO electrochromic thin film electrode based on NiO nanocrystals. *Materials Today Communications*, 2019, 21: 100635.
- (2) HERNANDEZ, Tyler S., et al. Bistable black electrochromic windows based on the reversible metal electrodeposition of Bi and Cu. *ACS Energy Letters*, 2017, 3.1: 104-111.
- (3) ZENG, Jinming, et al. Colorless-to-black electrochromic devices based on ambipolar electrochromic system consisting of cross-linked poly (4-vinyltriphenylamine) and tungsten trioxide with high optical contrast in visible and near-infrared regions. *Chemical Engineering Journal*, 2021, 404: 126402.
- (4) WANG, Rui, et al. Preparation, investigation and application of nickel oxide thin films in flexible all-thin-film electrochromic devices: from material to device. *Journal of Alloys and Compounds*, 2022, 898: 162879.
- (5) LOU, Qicun, et al. Toward Durably Flexible Nickel Oxide Electrochromic Film by Covering an 18 nm Zinc Tin Oxide Buffer Layer. *ACS Applied Energy Materials*, 2021, 4.11: 12935-12942.
- (6) SAFDAR, Bushra; PRASAD, Aryal Krishna; AHN, Kwang-Soon. NiCo-mixed hydroxide nanosheets as a new electrochromic material with fast optical response. *Chemical Physics Letters*, 2021, 783: 139024.
